# Supplementary material for: Direct synthesis of carbon quantum dots in aqueous polymer solution: one-pot reaction and preparation of transparent UV-blocking films
Source: Royal Society of Chemistry journal article supplement (doi:10.1039/c7ta00397h), 2017-01-01
Supplement: c7ta00397h1.pdf [file c7ta00397h1.pdf]

## Supporting Information

# Direct Synthesis of Carbon Quantum Dots in Aqueous Polymer Solution: One-Pot Reaction and Preparation of Transparent UV- Blocking Films

Samuel C. Hess,<sup>a</sup> Fitri A. Permatasari,<sup>b</sup> Hiromitsu Fukazawa,<sup>b</sup> Elia M. Schneider,<sup>a</sup> Ratna Balgis,<sup>b</sup> Takashi Ogi,<sup>b</sup>

Kikuo Okuyama<sup>b</sup> and Wendelin J. Stark<sup>a,\*</sup>

a. Institute for Chemical and Bioengineering, ETH Zurich, Vladimir-Prelog-Weg 1,  
8093 Zurich, Switzerland  
E-mail: [wendelin.stark@chem.ethz.ch](mailto:wendelin.stark@chem.ethz.ch)

b. Department of Chemical Engineering, Graduate School of Engineering, Hiroshima  
University, 1-4-1 Kagamiyama, Higashi-Hiroshima 739-8527, Japan.  
E-mail: [ogit@hiroshima-u.ac.jp](mailto:ogit@hiroshima-u.ac.jp)

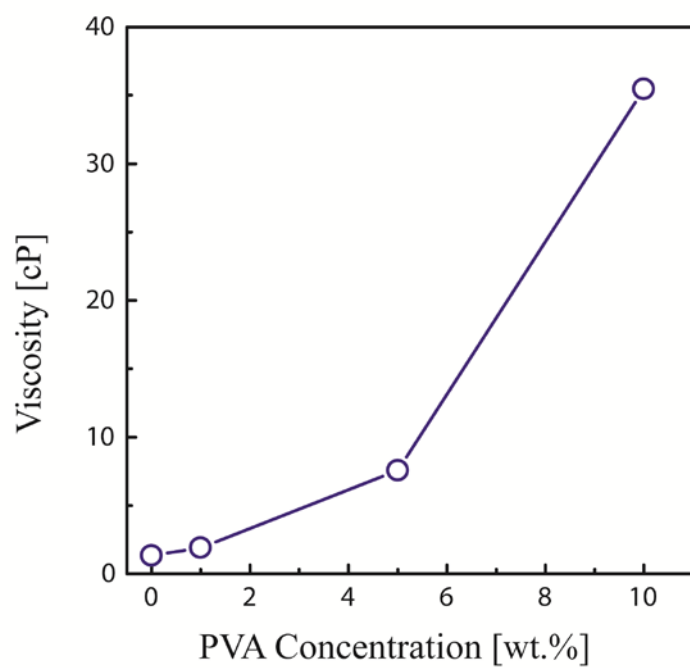

**Fig. S1:** Viscosity measurements of CQD precursor solutions containing 0, 1, 5 or 10 wt.% of PVA. The viscosity was measured at RT.

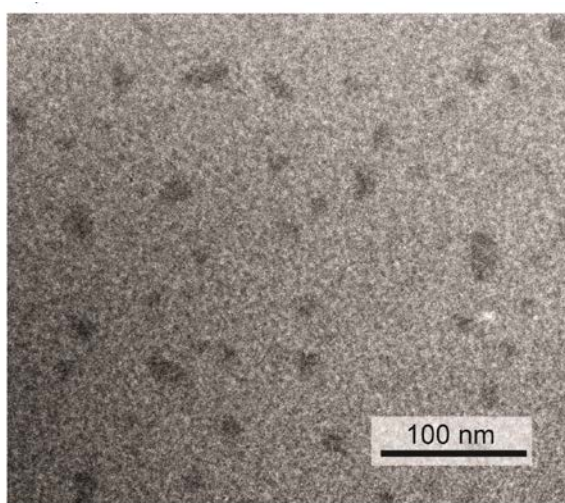

**Fig. S2:** TEM images of particles synthesized from 10 wt.% PVA, 10 wt.% CA, 2 wt.% b-PEI.

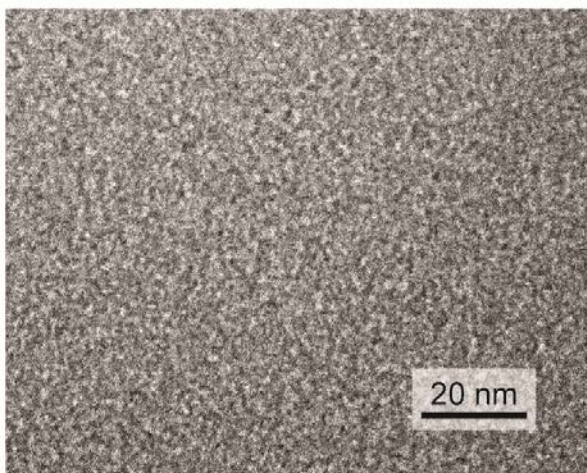

**Fig. S3:** Control TEM image of empty grid.

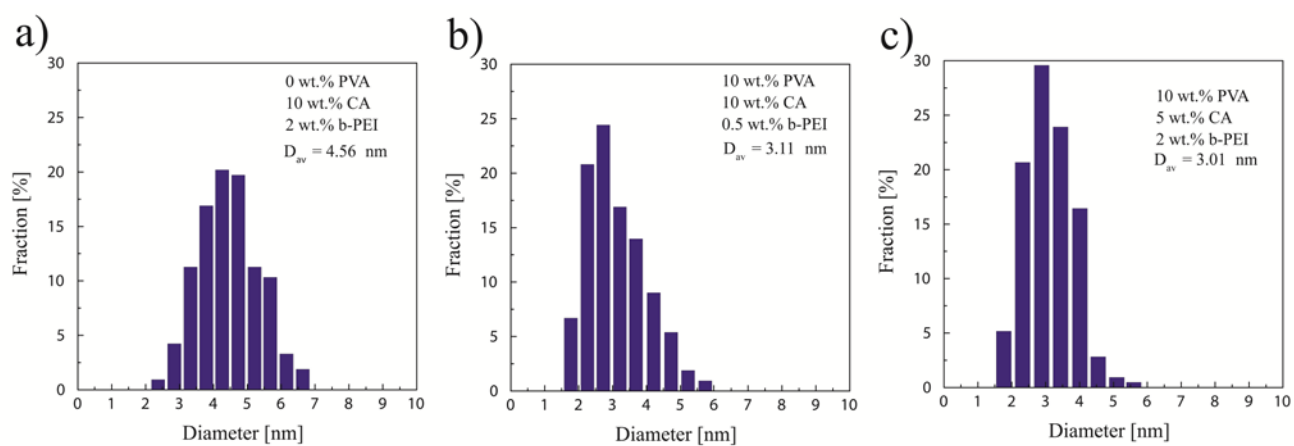

**Fig. S4:** Particle size distribution from TEM images. 213 CQDs were measured per sample a), b) and c).

**Table S1** pH as function of the citric acid (CA) concentration.

| CA concentration                                                 | pH        |                                    |                                    |
|------------------------------------------------------------------|-----------|------------------------------------|------------------------------------|
|                                                                  | Precursor | After synthesis for 15 min, 135 °C | Synthesized solution diluted 1:200 |
| 10 wt. %                                                         | 3.0       | 2.8                                | 3.5                                |
| 5 wt. %                                                          | 3.9       | 3.9                                | 4.0                                |
| 1 wt. %                                                          | 8.4       | 8.8                                | 9.1                                |
| All aqueous solutions contained: 10 wt. % PVA and 2 wt. % b-PEI. |           |                                    |                                    |

**Table S2** pH as function of the b-PEI concentration.

| b-PEI concentration                                                   | pH        |                                   |                                    |
|-----------------------------------------------------------------------|-----------|-----------------------------------|------------------------------------|
|                                                                       | Precursor | After synthesis for 15 min 135 °C | Synthesized solution diluted 1:200 |
| 5 wt. %                                                               | 4.3       | 4.3                               | 4.7                                |
| 2 wt. %                                                               | 3.0       | 2.8                               | 3.5                                |
| 0.5 wt. %                                                             | 2.2       | 2.0                               | 3.1                                |
| All aqueous precursor solutions contained: 10 wt. % PVA, 10 wt. % CA. |           |                                   |                                    |

**Table S3** Comparison of solution and film absorbance

| CA (wt. %)                                                                                         | pH diluted solution | Absorbance 171.5 $\mu\text{m}$ solution* | Absorbance dry film |
|----------------------------------------------------------------------------------------------------|---------------------|------------------------------------------|---------------------|
| 1                                                                                                  | 9.1                 | 0.11                                     | 0.21 (+91%)         |
| 5                                                                                                  | 4.0                 | 2.49                                     | 2.09 (-16%)         |
| 10                                                                                                 | 3.5                 | 2.83                                     | 3.19 (+13%)         |
| *calculated from measured values (1:200 diluted solution, 1 cm cuvette) according to Lambert-Beer. |                     |                                          |                     |

**Table S4** Film thicknesses.

| Sample                                                                                                           | Thickness          |
|------------------------------------------------------------------------------------------------------------------|--------------------|
| 1 wt. % CA                                                                                                       | 31 $\mu\text{m}$ * |
| 5 wt. % CA                                                                                                       | 34 $\mu\text{m}$ * |
| 10 wt. % CA                                                                                                      | 49 $\mu\text{m}$ * |
| *mean value of three measurements per sample. Films were all casted with a 171.5 $\mu\text{m}$ pitch spiral bar. |                    |

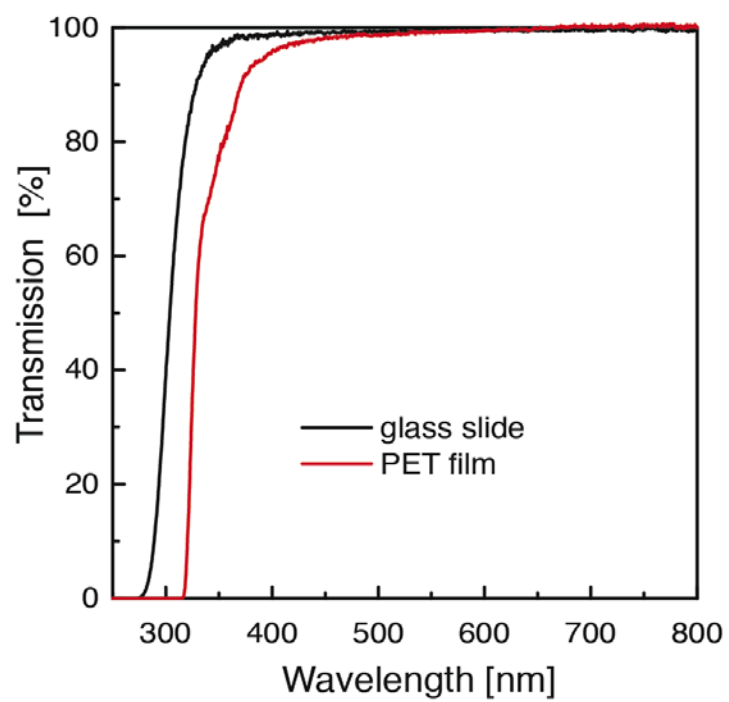

**Fig. S5:** UV-Vis transmission values of a PET film cut out from a commercially available PET bottle and an uncoated glass slide.

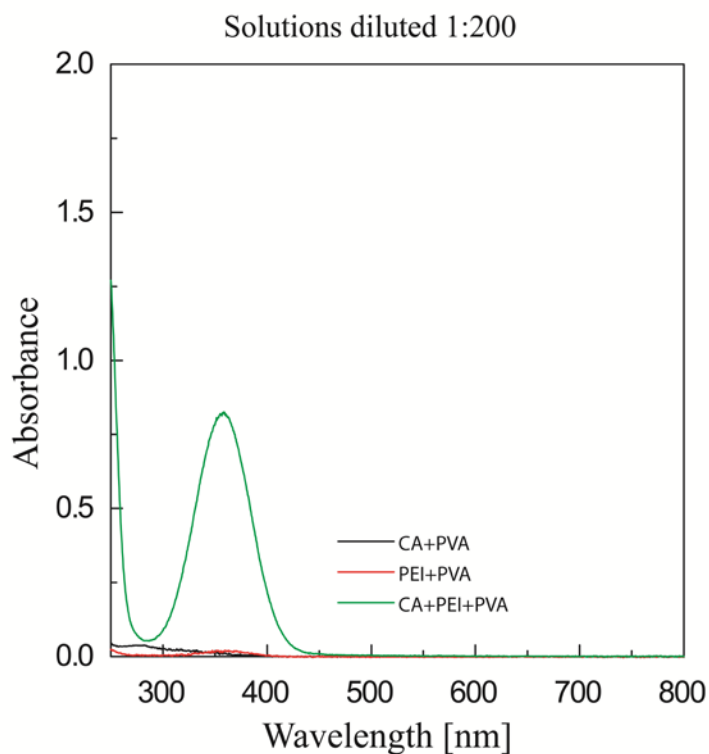

**Fig. S6:** Aqueous solution containing CA (10 wt.%) + PVA (10 wt.%) was synthesized for 15 min at 165 °C, the aqueous solution containing b-PEI (2 wt.%) + PVA (10 wt.%) was synthesized for 15 min at 135 °C and the one containing CA (10 wt.%) + b-PEI (2 wt.%) + PVA (10 wt.%) was synthesized for 15 min at 135 °C. All the solutions were diluted 1:200 before UV-Vis absorbance was measured.

**Table S5** Comparative overview of recently reported, commercially available and our UV protection film.

| Filler                            | Polymer matrix | Transmission (%) at: |        |        |        |        | Vis-transmission/<br>UV-A block factor | Reference          |
|-----------------------------------|----------------|----------------------|--------|--------|--------|--------|----------------------------------------|--------------------|
|                                   |                | 350 nm               | 400 nm | 500 nm | 600 nm | 700 nm |                                        |                    |
| Cellulose nanocrystals (0.5 wt.%) | PVA            | <75                  | >80    | >85    | >85    | >85    | 1.1                                    | <sup>14</sup>      |
| Graphene Oxide (0.8 wt.%)         | PVA            | <20                  | >30    | >50    | >70    | >75    | 2.8                                    | <sup>9</sup>       |
| CQD's                             | PVA            | <60                  | >70    | >75    | >75    | >90    | 1.3                                    | <sup>20</sup>      |
| *                                 | PP             | <30                  | >90    | >95    | >95    | >95    | 3.1                                    | Easy Coat BC-753** |
| CQD's                             | PVA            | < 5                  | >20    | >75    | >85    | >95    | 13.8                                   | This work          |

\*information not provided, \*\*commercially available UV-A protection film, Maruwakako Co., Ltd.

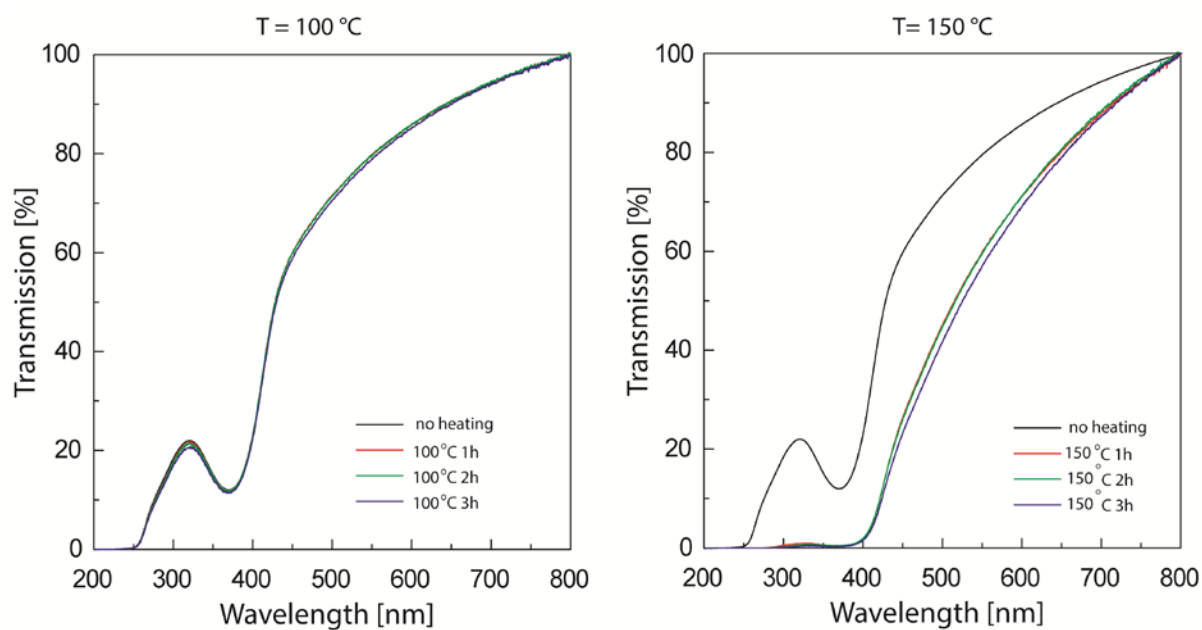

**Fig. S7:** Temperature stability testing of CQD-PVA films at 100 and 150 °C after 1, 2 and 3 hours of heat exposure. The films were tested on their UV-Vis transmission before and after exposure to elevated temperatures.
